# Supplementary material
Source: PubMed Central journal article supplement (PMC4074857)
Supplement: NIHMS548876-supplement-SF1.pdf [file NIHMS548876-supplement-SF1.pdf]

Supplemental Figure 1: Forest plot of the four risk alleles overall and study-specific:

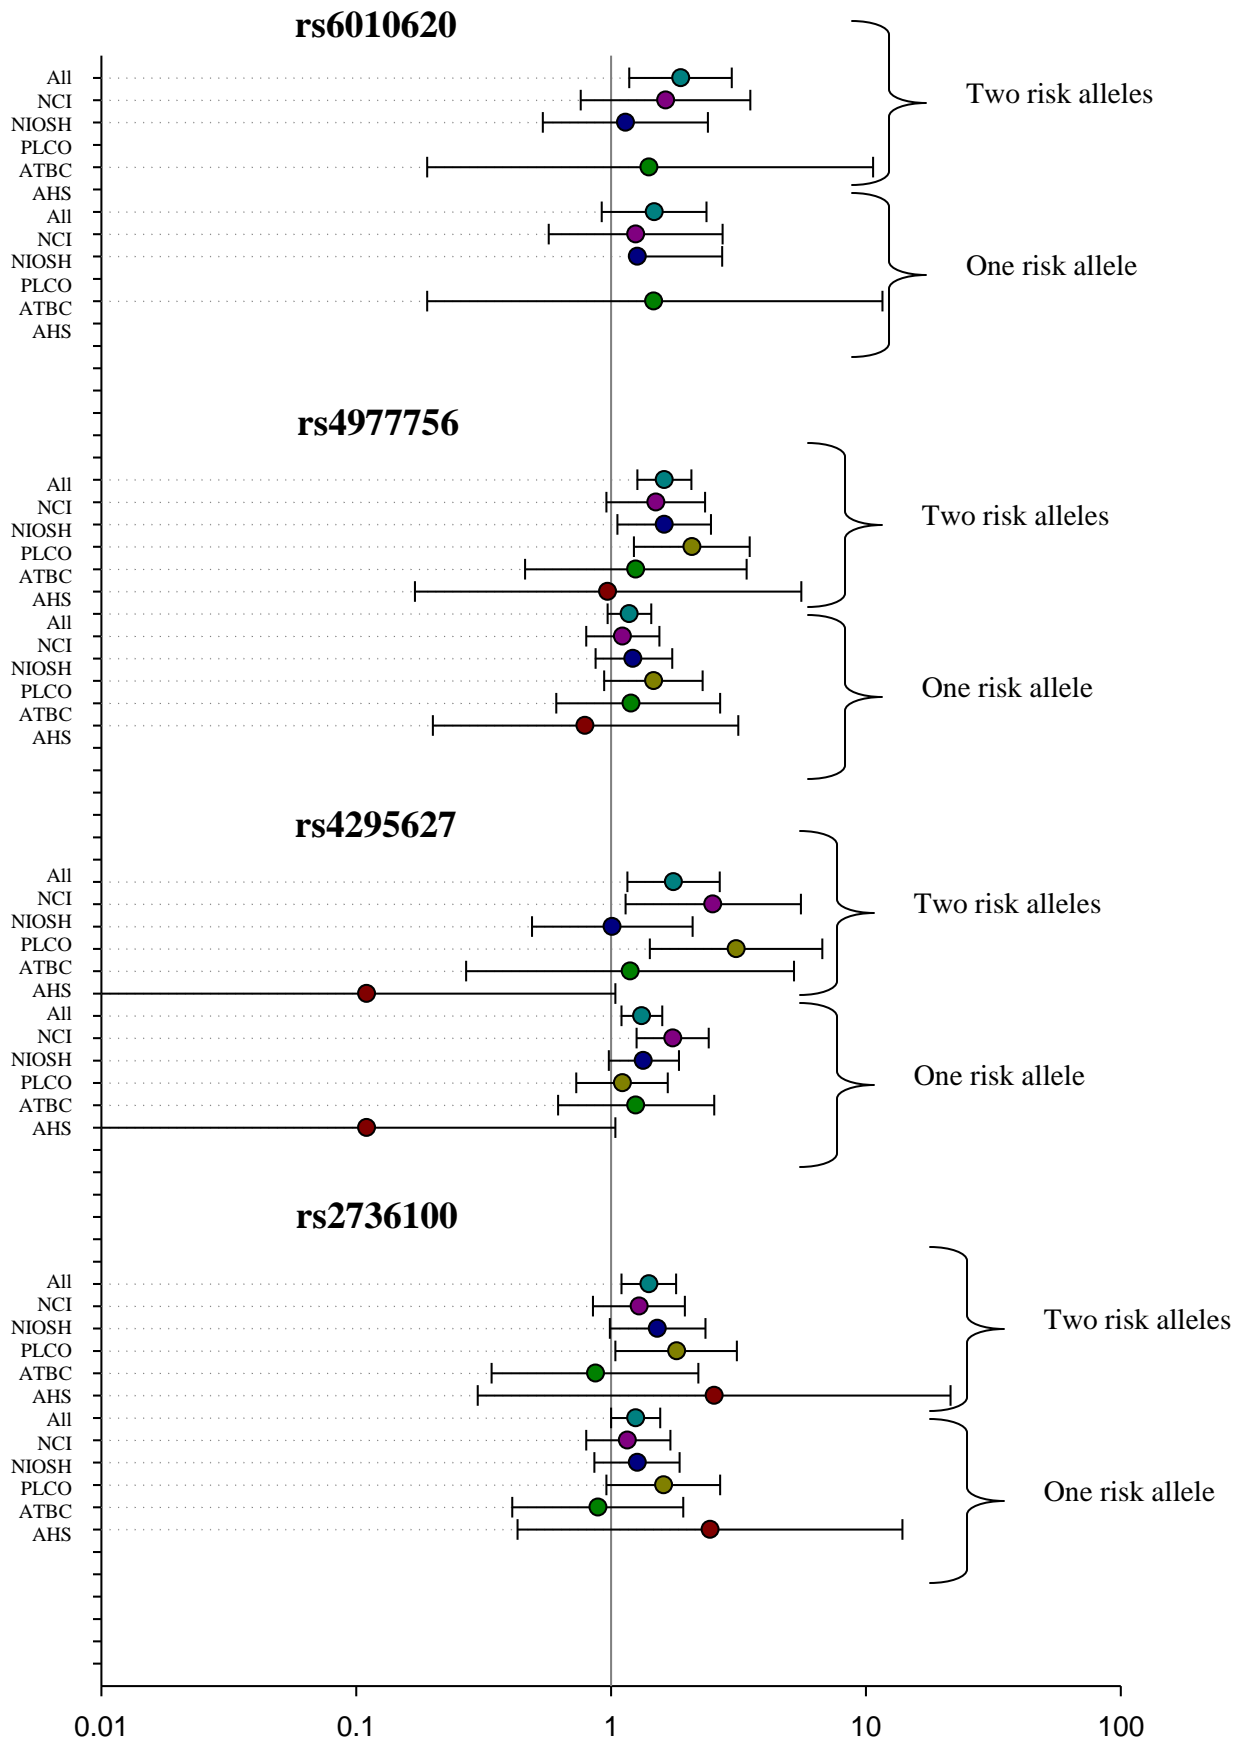

NCI=National Cancer Institute glioma case-control study.

NIOSH=National Institute of Occupational Safety and Health glioma case-control study.

PLCO= Glioma cases and controls identified from the Prostate, Lung, Colorectal and Ovarian Cancer Screening Trial.

ATBC= Glioma cases and controls identified from the Alpha-Tocopherol, Beta-Carotene Cancer Prevention Study.

AHS= Glioma cases and controls identified from the Agricultural Health Study.
