# Supplementary material
Source: PubMed Central journal article supplement (PMC4074857)
Supplement: NIHMS548876-supplement-ST1.pdf [file NIHMS548876-supplement-ST1.pdf]

Supplemental Table 1. Details of study design and participation by study

| Study               | Study period<br>(Recruitment) | Age<br>range | Glioma<br>Cases (n) | Case response rate<br>for blood collection | Controls<br>(n) | Control<br>response rate<br>for blood<br>collection | Cases<br>with<br>GWAS | Controls<br>with<br>GWAS | Total<br>genotyped | Total<br>with<br>GWAS | % with available<br>DNA SNPs (Based on<br>Cases & Controls) |
|---------------------|-------------------------------|--------------|---------------------|--------------------------------------------|-----------------|-----------------------------------------------------|-----------------------|--------------------------|--------------------|-----------------------|-------------------------------------------------------------|
| <b>Case-control</b> |                               |              |                     |                                            |                 |                                                     |                       |                          |                    |                       |                                                             |
| NCI                 | 1994-1998                     | 18+          | 386                 | 87%                                        | 473             | 75%                                                 | 351                   | 422                      | 859                | 773                   | 89.99                                                       |
| NIOSH               | 1995-1997                     | 18-80        | 324                 | 73%                                        | 565             | 72%                                                 | 305                   | 542                      | 889                | 847                   | 95.28                                                       |
| <b>Cohorts</b>      |                               |              |                     |                                            |                 |                                                     |                       |                          |                    |                       |                                                             |
| PLCO                | 1993-2001                     | 55-74        | 157                 | 58%                                        | 868             | *                                                   | 140                   | 857                      | 1025               | 997                   | 97.27                                                       |
| ATBC                | 1985-1988                     | 50-69 yrs    | 39                  | 70%                                        | 1271            | *                                                   | 37                    | 1270                     | 1310               | 1307                  | 99.77                                                       |
| AHS                 | 1993-1997                     | 30-64 yrs    | 21                  |                                            | 42              |                                                     | 18                    | 35                       | 63                 | 53                    | 84.13                                                       |
| <b>TOTAL</b>        |                               |              | <b>927</b>          |                                            | <b>3219</b>     |                                                     | <b>851</b>            | <b>3126</b>              | <b>4146</b>        | <b>3977</b>           | <b>95.92</b>                                                |

\*Controls from PLCO and ATBC are individuals without Glioma for whom genome-wide scans were previously completed.

NCI=National Cancer Institute glioma case-control study.

NIOSH=National Institute of Occupational Safety and Health glioma case-control study.

PLCO= Glioma cases and controls identified from the Prostate, Lung, Colorectal and Ovarian Cancer Screening Trial.

ATBC= Glioma cases and controls identified from the Alpha-Tocopherol, Beta-Carotene Cancer Prevention Study.

AHS= Glioma cases and controls identified from the Agricultural Health Study.
