# Supplementary material
Source: PubMed Central journal article supplement (PMC4074857)
Supplement: NIHMS548876-supplement-ST3.pdf [file NIHMS548876-supplement-ST3.pdf]

Table 3: Case Description – histologic distribution by study site:

| ICD Morphology Description      | Study      |            |            |            |           |            |           |            |            |            |            |            |
|---------------------------------|------------|------------|------------|------------|-----------|------------|-----------|------------|------------|------------|------------|------------|
|                                 | NCI        |            | NIOSH      |            | AHS       |            | ATBC      |            | PLCO       |            | Total      |            |
|                                 | N          | (%)        | N          | (%)        | N         | (%)        | N         | (%)        | N          | (%)        | N          | (%)        |
| Astrocytoma, Anaplastic         | 51         | 14.53      | 19         | 6.23       | 1         | 5.56       | .         | 0.00       | 5          | 3.57       | 76         | 8.93       |
| Astrocytoma, NOS                | 10         | 5.41       | 26         | 8.52       | .         | 0.00       | 2         | 5.41       | 7          | 5.00       | 54         | 6.35       |
| Desmoplastic Medulloblastoma    | .          | 0.00       | 2          | 0.66       | .         | 0.00       | .         | 0.00       | .          | 0.00       | 2          | 0.24       |
| Ependymoma, Anaplastic          | 2          | 0.57       | 1          | 0.33       | .         | 0.00       | .         | 0.00       | .          | 0.00       | 3          | 0.35       |
| Ependymoma, NOS                 | 7          | 1.99       | 3          | 0.98       | .         | 0.00       | 1         | 2.70       | .          | 0.00       | 11         | 1.29       |
| Fibrillary Astrocytoma          | 3          | 0.85       | 12         | 3.93       | 1         | 5.56       | .         | 0.00       | 5          | 3.57       | 21         | 2.47       |
| Ganglioglioma                   | 10         | 2.85       | .          | 0.00       | .         | 0.00       | .         | 0.00       | .          | 0.00       | 10         | 1.18       |
| Gemistocytic Astrocytoma        | 1          | 0.28       | 4          | 1.31       | .         | 0.00       | .         | 0.00       | .          | 0.00       | 5          | 0.59       |
| Giant Cell Glioblastoma         | 3          | 0.85       | 3          | 0.98       | .         | 0.00       | .         | 0.00       | .          | 0.00       | 6          | 0.71       |
| Glioblastoma, NOS               | 166        | 47.29      | 138        | 45.25      | 12        | 66.67      | 5         | 13.51      | 82         | 58.57      | 403        | 47.36      |
| Glioma, NOS                     | .          | 0.00       | .          | 0.00       | .         | 0.00       | 10        | 27.03      | 26         | 18.57      | 36         | 4.23       |
| Gliomatosis Cerebri             | .          | 0.00       | 1          | 0.33       | .         | 0.00       | .         | 0.00       | .          | 0.00       | 1          | 0.12       |
| Gliosarcoma                     | 2          | 0.57       | 1          | 0.33       | .         | 0.00       | 1         | 2.70       | 5          | 3.57       | 9          | 1.06       |
| Malignant Glioma                | 12         | 3.42       | 7          | 2.30       | .         | 0.00       | 16        | 43.24      | 4          | 2.86       | 39         | 4.58       |
| Medulloblastoma, NOS            | 4          | 1.14       | 5          | 1.64       | 1         | 5.56       | .         | 0.00       | .          | 0.00       | 10         | 1.18       |
| Mixed Glioma                    | 21         | 5.98       | 16         | 5.25       | .         | 0.00       | 1         | 2.70       | 1          | 0.71       | 39         | 4.58       |
| Neoplasm, Benign                | .          | 0.00       | .          | 0.00       | .         | 0.00       | .         | 0.00       | 1          | 0.71       | 1          | 0.12       |
| Neuroblastoma                   | 1          | 0.28       | .          | 0.00       | .         | 0.00       | .         | 0.00       | .          | 0.00       | 1          | 0.12       |
| Neurocytoma                     | 2          | 0.57       | .          | 0.00       | .         | 0.00       | .         | 0.00       | .          | 0.00       | 2          | 0.24       |
| Neuroepithelioma                | 1          | 0.28       | .          | 0.00       | .         | 0.00       | .         | 0.00       | .          | 0.00       | 1          | 0.12       |
| Oligodendroglioma, Anaplastic   | 7          | 1.99       | 4          | 1.31       | .         | 0.00       | .         | 0.00       | 1          | 0.71       | 12         | 1.41       |
| Oligodendroglioma, NOS          | 31         | 8.83       | 43         | 14.10      | 3         | 16.67      | 1         | 2.70       | 2          | 1.43       | 80         | 9.40       |
| Pilocytic Astrocytoma           | 4          | 1.14       | 17         | 5.57       | .         | 0.00       | .         | 0.00       | 1          | 0.71       | 22         | 2.59       |
| Pleomorphic Xanthoastrocytoma   | .          | 0.00       | 1          | 0.33       | .         | 0.00       | .         | 0.00       | .          | 0.00       | 1          | 0.12       |
| Primitive Neuroectodermal Tumor | 1          | 0.28       | 1          | 0.33       | .         | 0.00       | .         | 0.00       | .          | 0.00       | 2          | 0.24       |
| Subependymal Glioma             | 3          | 0.85       | 1          | 0.33       | .         | 0.00       | .         | 0.00       | .          | 0.00       | 4          | 0.47       |
| <b>Total</b>                    | <b>351</b> | <b>100</b> | <b>305</b> | <b>100</b> | <b>18</b> | <b>100</b> | <b>37</b> | <b>100</b> | <b>140</b> | <b>100</b> | <b>851</b> | <b>100</b> |

NCI=National Cancer Institute glioma case-control study.

NIOSH=National Institute of Occupational Safety and Health glioma case-control study.

PLCO= Glioma cases and controls identified from the Prostate, Lung, Colorectal and Ovarian Cancer Screening Trial.

ATBC= Glioma cases and controls identified from the Alpha-Tocopherol, Beta-Carotene Cancer Prevention Study.

AHS= Glioma cases and controls identified from the Agricultural Health Study.
