# Supplementary material
Source: PubMed Central journal article supplement (PMC4074857)
Supplement: NIHMS548876-supplement-ST4.pdf [file NIHMS548876-supplement-ST4.pdf]

Supplemental Table 4: Allele Frequencies by Study: among Caucasian cases and controls

| SNP              | Study        | GENOTYPE | CONTROLS<br>(n) | CNTL_           |              | CASE_        |  |
|------------------|--------------|----------|-----------------|-----------------|--------------|--------------|--|
|                  |              |          |                 | CONTROLS<br>(%) | CASES<br>(n) | CASES<br>(%) |  |
| <b>rs2736100</b> | <b>NCI</b>   | TT       | 96              | 25              | 70           | 21.74        |  |
|                  |              | GT       | 181             | 47.14           | 152          | 47.2         |  |
|                  |              | GG       | 107             | 27.86           | 100          | 31.06        |  |
|                  |              | GT+GG    | 288             | 75              | 252          | 78.26        |  |
|                  | <b>NIOSH</b> | TT       | 127             | 23.61           | 59           | 19.67        |  |
|                  |              | GT       | 280             | 52.04           | 151          | 50.33        |  |
|                  |              | GG       | 131             | 24.35           | 90           | 30           |  |
|                  |              | GT+GG    | 411             | 76.39           | 241          | 80.33        |  |
|                  | <b>AHS</b>   | TT       | 9               | 25.71           | 2            | 11.11        |  |
|                  |              | GT       | 20              | 57.14           | 13           | 72.22        |  |
|                  |              | GG       | 6               | 17.14           | 3            | 16.67        |  |
|                  |              | GT+GG    | 26              | 74.29           | 16           | 88.89        |  |
|                  | <b>ATBC</b>  | TT       | 339             | 26.71           | 11           | 29.73        |  |
|                  |              | GT       | 626             | 49.33           | 18           | 48.65        |  |
|                  |              | GG       | 304             | 23.96           | 8            | 21.62        |  |
|                  |              | GT+GG    | 930             | 73.29           | 26           | 70.27        |  |
|                  | <b>PLCO</b>  | TT       | 218             | 25.53           | 22           | 16.54        |  |
|                  |              | GT       | 404             | 47.31           | 68           | 51.13        |  |
|                  |              | GG       | 232             | 27.17           | 43           | 32.33        |  |
|                  |              | GT+GG    | 636             | 74.47           | 111          | 83.46        |  |
| <b>rs4295627</b> | <b>NCI</b>   |          |                 |                 |              |              |  |

|                  |              |       |     |       |     |       |
|------------------|--------------|-------|-----|-------|-----|-------|
|                  |              | TT    | 267 | 69.35 | 182 | 56.52 |
|                  |              | GT    | 107 | 27.79 | 123 | 38.2  |
|                  |              | GG    | 11  | 2.86  | 17  | 5.28  |
|                  |              | GT+GG | 118 | 30.65 | 140 | 43.48 |
|                  | <b>NIOSH</b> |       |     |       |     |       |
|                  |              | TT    | 357 | 66.36 | 179 | 59.67 |
|                  |              | GT    | 158 | 29.37 | 107 | 35.67 |
|                  |              | GG    | 23  | 4.28  | 14  | 4.67  |
|                  |              | GT+GG | 181 | 33.64 | 121 | 40.33 |
|                  | <b>AHS</b>   |       |     |       |     |       |
|                  |              | TT    | 23  | 65.71 | 17  | 94.44 |
|                  |              | GT    | 12  | 34.29 | 1   | 5.56  |
|                  |              | GT+GG | 12  | 34.29 | 1   | 5.56  |
|                  | <b>ATBC</b>  |       |     |       |     |       |
|                  |              | TT    | 794 | 62.52 | 22  | 59.46 |
|                  |              | GT    | 410 | 32.28 | 13  | 35.14 |
|                  |              | GG    | 66  | 5.2   | 2   | 5.41  |
|                  |              | GT+GG | 476 | 37.48 | 15  | 40.54 |
|                  | <b>PLCO</b>  |       |     |       |     |       |
|                  |              | TT    | 584 | 68.3  | 83  | 62.41 |
|                  |              | GT    | 248 | 29.01 | 40  | 30.08 |
|                  |              | GG    | 23  | 2.69  | 10  | 7.52  |
|                  |              | GT+GG | 271 | 31.7  | 50  | 37.59 |
| <b>rs4977756</b> | <b>NCI</b>   |       |     |       |     |       |
|                  |              | AA    | 145 | 37.66 | 107 | 33.23 |
|                  |              | AG    | 185 | 48.05 | 151 | 46.89 |
|                  |              | GG    | 55  | 14.29 | 64  | 19.88 |
|                  |              | AG+GG | 240 | 62.34 | 215 | 66.77 |
|                  | <b>NIOSH</b> |       |     |       |     |       |
|                  |              | AA    | 185 | 34.45 | 88  | 29.33 |
|                  |              | AG    | 255 | 47.49 | 142 | 47.33 |

|                 |              |       |     |       |     |       |
|-----------------|--------------|-------|-----|-------|-----|-------|
|                 |              | GG    | 97  | 18.06 | 70  | 23.33 |
|                 |              | AG+GG | 352 | 65.55 | 212 | 70.67 |
|                 | <b>AHS</b>   |       |     |       |     |       |
|                 |              | AA    | 12  | 34.29 | 7   | 38.89 |
|                 |              | AG    | 16  | 45.71 | 7   | 38.89 |
|                 |              | GG    | 7   | 20    | 4   | 22.22 |
|                 |              | AG+GG | 23  | 65.71 | 11  | 61.11 |
|                 | <b>ATBC</b>  |       |     |       |     |       |
|                 |              | AA    | 462 | 36.41 | 12  | 32.43 |
|                 |              | AG    | 604 | 47.6  | 19  | 51.35 |
|                 |              | GG    | 203 | 16    | 6   | 16.22 |
|                 |              | AG+GG | 807 | 63.59 | 25  | 67.57 |
|                 | <b>PLCO</b>  |       |     |       |     |       |
|                 |              | AA    | 308 | 36.02 | 34  | 25.56 |
|                 |              | AG    | 400 | 46.78 | 64  | 48.12 |
|                 |              | GG    | 147 | 17.19 | 35  | 26.32 |
|                 |              | AG+GG | 547 | 63.98 | 99  | 74.44 |
| <b>rs498872</b> | <b>NCI</b>   |       |     |       |     |       |
|                 |              | CC    | 185 | 48.18 | 133 | 41.56 |
|                 |              | CT    | 168 | 43.75 | 152 | 47.5  |
|                 |              | TT    | 31  | 8.07  | 35  | 10.94 |
|                 |              | CT+TT | 199 | 51.82 | 187 | 58.44 |
|                 | <b>NIOSH</b> |       |     |       |     |       |
|                 |              | CC    | 267 | 49.54 | 137 | 45.67 |
|                 |              | CT    | 218 | 40.45 | 126 | 42    |
|                 |              | TT    | 54  | 10.02 | 37  | 12.33 |
|                 |              | CT+TT | 272 | 50.46 | 163 | 54.33 |
|                 | <b>AHS</b>   |       |     |       |     |       |
|                 |              | CC    | 16  | 45.71 | 7   | 38.89 |
|                 |              | CT    | 16  | 45.71 | 9   | 50    |
|                 |              | TT    | 3   | 8.57  | 2   | 11.11 |

|             |              |       |       |       |       |       |
|-------------|--------------|-------|-------|-------|-------|-------|
| rs6010620   | <b>ATBC</b>  | CT+TT | 19    | 54.29 | 11    | 61.11 |
|             |              | CC    | 569   | 44.84 | 16    | 43.24 |
|             |              | CT    | 565   | 44.52 | 17    | 45.95 |
|             |              | TT    | 135   | 10.64 | 4     | 10.81 |
|             | <b>PLCO</b>  | CT+TT | 700   | 55.16 | 21    | 56.76 |
|             |              | CC    | 390   | 45.61 | 70    | 52.63 |
|             |              | CT    | 374   | 43.74 | 55    | 41.35 |
|             |              | TT    | 91    | 10.64 | 8     | 6.02  |
|             | <b>NCI</b>   | CT+TT | 465   | 54.39 | 63    | 47.37 |
|             |              | AA    | 20    | 5.19  | 11    | 3.42  |
|             |              | AG    | 134   | 34.81 | 93    | 28.88 |
|             |              | GG    | 231   | 60    | 218   | 67.7  |
|             | <b>NIOSH</b> | AG+GG | 365   | 94.81 | 311   | 96.58 |
|             |              | AA    | 25    | 4.64  | 12    | 4     |
|             |              | AG    | 175   | 32.47 | 106   | 35.33 |
|             |              | GG    | 339   | 62.89 | 182   | 60.67 |
|             | <b>AHS</b>   | AG+GG | 514   | 95.36 | 288   | 96    |
|             |              | AA    | 1     | 2.86  | 2     | 11.11 |
|             |              | AG    | 8     | 22.86 | 6     | 33.33 |
|             |              | GG    | 26    | 74.29 | 10    | 55.56 |
| <b>ATBC</b> | AG+GG        | 34    | 97.14 | 16    | 88.89 |       |
|             | AA           | 51    | 4.02  | 1     | 2.7   |       |
|             | AG           | 374   | 29.47 | 11    | 29.73 |       |
|             | GG           | 844   | 66.51 | 25    | 67.57 |       |
|             |              | AG+GG | 1218  | 95.98 | 36    | 97.3  |

**PLCO**

|       |     |       |     |      |
|-------|-----|-------|-----|------|
| AA    | 51  | 5.96  | .   | .    |
| AG    | 323 | 37.78 | 29  | 21.8 |
| GG    | 481 | 56.26 | 104 | 78.2 |
| AG+GG | 804 | 94.04 | 133 | 100  |

NCI=National Cancer Institute glioma case-control study.

NIOSH=National Institute of Occupational Safety and Health glioma case-control study.

PLCO= Glioma cases and controls identified from the Prostate, Lung, Colorectal and Ovarian Cancer Screening Trial.

ATBC= Glioma cases and controls identified from the Alpha-Tocopherol, Beta-Carotene Cancer Prevention Study.

AHS= Glioma cases and controls identified from the Agricultural Health Study.
