# Supplementary material
Source: PubMed Central journal article supplement (PMC4074857)
Supplement: NIHMS548876-supplement-ST5.pdf [file NIHMS548876-supplement-ST5.pdf]

Supplementary Table 5: Allergy/autoimmune variable asked in each study

| <b>Any allergy</b>                 | <b>NCI</b> | <b>NIOSH</b> | <b>PLCO</b> | <b>ATBC</b> | <b>AHS</b> |
|------------------------------------|------------|--------------|-------------|-------------|------------|
| Asthma                             | X          |              | X           | X           | X          |
| Hay Fever                          | X          | X            |             | X           | X          |
| Eczema                             | X          |              |             | X           | X          |
| Other allergy                      | X          |              |             |             | X          |
| Allergic skin condition            |            |              |             | X           |            |
| <b>Any Autoimmune</b>              |            |              |             |             |            |
| Diabetes                           | X          | X            | X           | X           | X          |
| Rheumatoid Arthritis               | X          |              | X           | X           | X          |
| Ulcerative Colitis/Crohn's disease |            |              | X           |             | X          |
| Lupus                              | X          |              |             |             | X          |
| Psoriasis                          |            |              |             | X           | X          |
| Multiple Sclerosis                 | X          |              |             |             |            |
| Pernicious anemia                  | X          |              |             |             | X          |
| Scleroderma                        |            |              |             |             | X          |
| Grave's disease                    |            |              |             |             | X          |
| Vitiligo                           |            |              |             |             | X          |
| Myasthenia gravis                  |            |              |             |             | X          |
| Sjorgen's                          |            |              |             |             | X          |

NCI=National Cancer Institute glioma case-control study.

NIOSH=National Institute of Occupational Safety and Health glioma case-control study.

PLCO= Glioma cases and controls identified from the Prostate, Lung, Colorectal and Ovarian Cancer Screening Trial.

ATBC= Glioma cases and controls identified from the Alpha-Tocopherol, Beta-Carotene Cancer Prevention Study.

AHS= Glioma cases and controls identified from the Agricultural Health Study.
