# Supplementary material
Source: PubMed Central journal article supplement (PMC4074857)
Supplement: NIHMS548876-supplement-ST6.pdf [file NIHMS548876-supplement-ST6.pdf]

Supplemental Table 6: Frequencies of allergy/autoimmune conditions by Study:

|                                                 | Study |       |       |        |     |       |      |       |      |        | Total |       |
|-------------------------------------------------|-------|-------|-------|--------|-----|-------|------|-------|------|--------|-------|-------|
|                                                 | NCI   |       | NIOSH |        | AHS |       | ATBC |       | PLCO |        |       |       |
|                                                 | N     | PctN  | N     | PctN   | N   | PctN  | N    | PctN  | N    | PctN   | N     | PctN  |
| <b>Any allergy</b>                              |       |       |       |        |     |       |      |       |      |        |       |       |
| N/A                                             | 15    | 2.12  | 2     | 0.24   | .   | .     | .    | .     | 435  | 44.03  | 452   | 11.61 |
| No                                              | 457   | 64.64 | 741   | 88.32  | 44  | 83.02 | 1068 | 81.71 | 495  | 50.10  | 2805  | 72.03 |
| Yes                                             | 235   | 33.24 | 96    | 11.44  | 9   | 16.98 | 239  | 18.29 | 58   | 5.87   | 637   | 16.36 |
|                                                 |       |       |       |        |     |       |      |       |      |        |       |       |
| <b>Personal history of asthma</b>               |       |       |       |        |     |       |      |       |      |        |       |       |
| N/A                                             | .     | .     | .     | .      | .   | .     | .    | .     | 328  | 33.20  | 328   | 8.42  |
| Unknown                                         | 12    | 1.70  | 2     | 0.24   | .   | .     | .    | .     | 107  | 10.83  | 121   | 3.11  |
| No                                              | 619   | 87.55 | 741   | 88.32  | 47  | 88.68 | 1271 | 97.25 | 495  | 50.10  | 3173  | 81.48 |
| Yes                                             | 76    | 10.75 | 96    | 11.44  | 6   | 11.32 | 36   | 2.75  | 58   | 5.87   | 272   | 6.99  |
|                                                 |       |       |       |        |     |       |      |       |      |        |       |       |
| <b>Personal history of eczema</b>               |       |       |       |        |     |       |      |       |      |        |       |       |
| N/A                                             | .     | .     | .     | .      | 10  | 18.87 | .    | .     | 988  | 100.00 | 998   | 25.63 |
| Unknown                                         | 11    | 1.56  | 2     | 0.24   | .   | .     | .    | .     | .    | .      | 13    | 0.33  |
| No                                              | 655   | 92.64 | 741   | 88.32  | 42  | 79.25 | 1210 | 92.58 | .    | .      | 2648  | 68.00 |
| Yes                                             | 41    | 5.80  | 96    | 11.44  | 1   | 1.89  | 97   | 7.42  | .    | .      | 235   | 6.03  |
|                                                 |       |       |       |        |     |       |      |       |      |        |       |       |
| <b>Personal history of hay fever</b>            |       |       |       |        |     |       |      |       |      |        |       |       |
| N/A                                             | .     | .     | .     | .      | 10  | 18.87 | 19   | 1.45  | 988  | 100.00 | 1017  | 26.12 |
| Unknown                                         | 12    | 1.70  | 2     | 0.24   | .   | .     | .    | .     | .    | .      | 14    | 0.36  |
| No                                              | 609   | 86.14 | 741   | 88.32  | 41  | 77.36 | 1170 | 89.52 | .    | .      | 2561  | 65.77 |
| Yes                                             | 86    | 12.16 | 96    | 11.44  | 2   | 3.77  | 118  | 9.03  | .    | .      | 302   | 7.76  |
|                                                 |       |       |       |        |     |       |      |       |      |        |       |       |
| <b>Any Autoimmune</b>                           |       |       |       |        |     |       |      |       |      |        |       |       |
| N/A                                             | 19    | 2.69  | .     | .      | 3   | 5.66  | .    | .     | 242  | 24.49  | 264   | 6.78  |
| No                                              | 583   | 82.46 | 801   | 95.47  | 41  | 77.36 | 1200 | 91.81 | 637  | 64.47  | 3262  | 83.77 |
| Yes                                             | 105   | 14.85 | 38    | 4.53   | 9   | 16.98 | 107  | 8.19  | 109  | 11.03  | 368   | 9.45  |
|                                                 |       |       |       |        |     |       |      |       |      |        |       |       |
| <b>Personal history of rheumatoid arthritis</b> |       |       |       |        |     |       |      |       |      |        |       |       |
| N/A                                             | .     | .     | 839   | 100.00 | 10  | 18.87 | .    | .     | .    | .      | 849   | 21.80 |
| Unknown                                         | 16    | 2.26  | .     | .      | .   | .     | .    | .     | 274  | 27.73  | 290   | 7.45  |
| No                                              | 648   | 91.65 | .     | .      | 40  | 75.47 | 1269 | 97.09 | 684  | 69.23  | 2641  | 67.82 |

|                                     |            |               |            |               |           |               |             |               |            |               |             |               |
|-------------------------------------|------------|---------------|------------|---------------|-----------|---------------|-------------|---------------|------------|---------------|-------------|---------------|
| Yes                                 | 43         | 6.08          | .          | .             | 3         | 5.66          | 38          | 2.91          | 30         | 3.04          | 114         | 2.93          |
|                                     |            |               |            |               |           |               |             |               |            |               |             |               |
| <b>Personal history of diabetes</b> |            |               |            |               |           |               |             |               |            |               |             |               |
| Unknown                             | 10         | 1.41          | .          | .             | 1         | 1.89          | .           | .             | 29         | 2.94          | 40          | 1.03          |
| No                                  | 647        | 91.51         | 801        | 95.47         | 50        | 94.34         | 1264        | 96.71         | 902        | 91.30         | 3664        | 94.09         |
| Yes                                 | 50         | 7.07          | 38         | 4.53          | 2         | 3.77          | 43          | 3,29          | 57         | 5.77          | 190         | 4.88          |
| <b>Total</b>                        | <b>707</b> | <b>100.00</b> | <b>839</b> | <b>100.00</b> | <b>53</b> | <b>100.00</b> | <b>1307</b> | <b>100.00</b> | <b>988</b> | <b>100.00</b> | <b>3894</b> | <b>100.00</b> |

N/A = Not applicable

NCI=National Cancer Institute glioma case-control study.

NIOSH=National Institute of Occupational Safety and Health glioma case-control study.

PLCO= Glioma cases and controls identified from the Prostate, Lung, Colorectal and Ovarian Cancer Screening Trial.

ATBC= Glioma cases and controls identified from the Alpha-Tocopherol, Beta-Carotene Cancer Prevention Study.

AHS= Glioma cases and controls identified from the Agricultural Health Study.
