# Supplementary material
Source: PubMed Central journal article supplement (PMC4074857)
Supplement: NIHMS548876-supplement-ST8.pdf [file NIHMS548876-supplement-ST8.pdf]

Supplemental Table 8: Odds ratio for risk of glioma in relation to any allergy and asthma in subjects with 0, 1, or 2 risk alleles per single nucleotide polymorphism. (This table is to facilitate comparison with Schoemaker’s (13) significant findings)

|                    | Case with Disease* | Controls with Disease* | 0 risk allele    | 1 risk allele    | 2 risk alleles   |                  |                |
|--------------------|--------------------|------------------------|------------------|------------------|------------------|------------------|----------------|
|                    |                    |                        | OR (95% CI)      | OR (95% CI)      | OR (95% CI)      | p-heterogeneity! | p-interaction¶ |
| <b>Asthma</b>      | 57 (8.04%)         | 215 (7.86%)            |                  |                  |                  |                  |                |
| rs4977756          |                    |                        | 0.61 (0.33-1.11) | 0.48 (0.29-0.80) | 0.68 (0.35-1.34) | 0.34             | 0.62           |
| rs498872           |                    |                        | 0.63 (0.39-1.01) | 0.56 (0.33-0.93) | 0.53 (0.15-1.82) | 0.93             | 0.93           |
| rs6010620          |                    |                        | 0.26 (0.04-1.68) | 0.57 (0.32-1.01) | 0.60 (0.39-0.91) | 0.56             | 0.91           |
| <b>Any Allergy</b> | 134 (18.93%)       | 503 (18.40%)           |                  |                  |                  |                  |                |
| rs4977756          |                    |                        | 0.79 (0.51-1.21) | 0.63 (0.44-0.91) | 0.71 (0.41-1.24) | 0.32             | 0.58           |
| rs498872           |                    |                        | 0.64 (0.44-0.93) | 0.82 (0.57-1.18) | 0.70 (0.29-1.65) | 0.19             | 0.45           |
| rs6010620          |                    |                        | 0.36 (0.07-1.72) | 0.93 (0.61-1.43) | 0.63 (0.46-0.86) | 0.14             | 0.46           |

\*Cases and controls with “Asthma” and “Any allergy”

! Chi-square estimated as the difference between the -2 log likelihood from two models, (i) with main effects only (ii) main effects and product term. p-value based on one degree of freedom

¶Estimated by including a product term between the cofactor (i.e. asthma, any allergy) with the genotype.
